# Supplementary material for: Generation of Vascular Endothelial Cells and Hematopoietic Cells by Blastocyst Complementation
Source: PubMed Central journal article supplement — Stem Cell Reports. 2018 Sep 20;11(4):988–97. doi: 10.1016/j.stemcr.2018.08.015 (PMC6178562; doi:10.1016/j.stemcr.2018.08.015), 2018-09-20
Supplement: mmc1.pdf [file mmc1.pdf]

**Stem Cell Reports, Volume 11**

## **Supplemental Information**

### **Generation of Vascular Endothelial Cells and Hematopoietic Cells by Blastocyst Complementation**

**Sanae Hamanaka, Ayumi Umino, Hideyuki Sato, Tomonari Hayama, Ayaka Yanagida, Naoaki Mizuno, Toshihiro Kobayashi, Mariko Kasai, Fabian Patrik Suchy, Satoshi Yamazaki, Hideki Masaki, Tomoyuki Yamaguchi, and Hiromitsu Nakauchi**

## **SUPPLEMENTAL INVENTORY**

### **Generation of Vascular Endothelial Cells and Hematopoietic Cells by Blastocyst Complementation**

Sanae Hamanaka<sup>1</sup>, Ayumi Umino<sup>1</sup>, Hideyuki Sato<sup>1</sup>, Tomonari Hayama<sup>1,2</sup>, Ayaka Yanagida<sup>1,3</sup>, Naoaki Mizuno<sup>1</sup>, Toshihiro Kobayashi<sup>1,4</sup>, Mariko Kasai<sup>1</sup>, Fabian Patrik Suchy<sup>5</sup>, Satoshi Yamazaki<sup>1</sup>, Hideki Masaki<sup>1</sup>, Tomoyuki Yamaguchi<sup>1,\*</sup>, and Hiromitsu Nakauchi<sup>1,5,\*</sup>

#### **Inventory of supplemental information**

**Figure S1: This figure is related to Figure 1.**

**Figure S2: This figure is related to Figure 2.**

**Figure S3: This figure is related to Figure 3.**

**Figure S4: This figure is related to Figure 4**

**Table S1: This table is related to Table 1.**

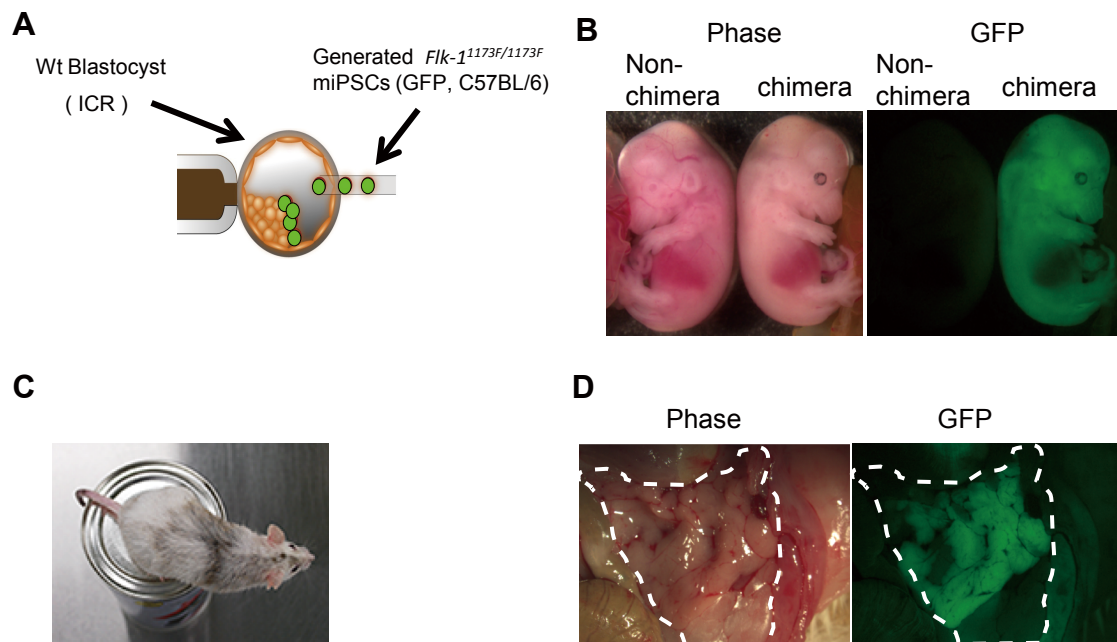

**Figure S1. Generation of *Flk-1*<sup>1173/1173</sup> chimeric mice. Related to Figure 1.**

(A) *Flk-1*<sup>1173/1173</sup> chimera generated by injection of *Flk-1*<sup>1173/1173</sup> EGFP-expressing miPSCs into ICR wildtype mouse blastocysts.

(B) E14.5 mice have systemic chimera.

(C) Representative 26-week-old *Flk-1*<sup>1173/1173</sup> chimera mouse was shown. Black eyes and black/brown coat were derived from *Flk-1*<sup>1173/1173</sup> EGFP-expressing miPSCs.

(D) Analysis of chimerism in the pancreas of an adult chimera.

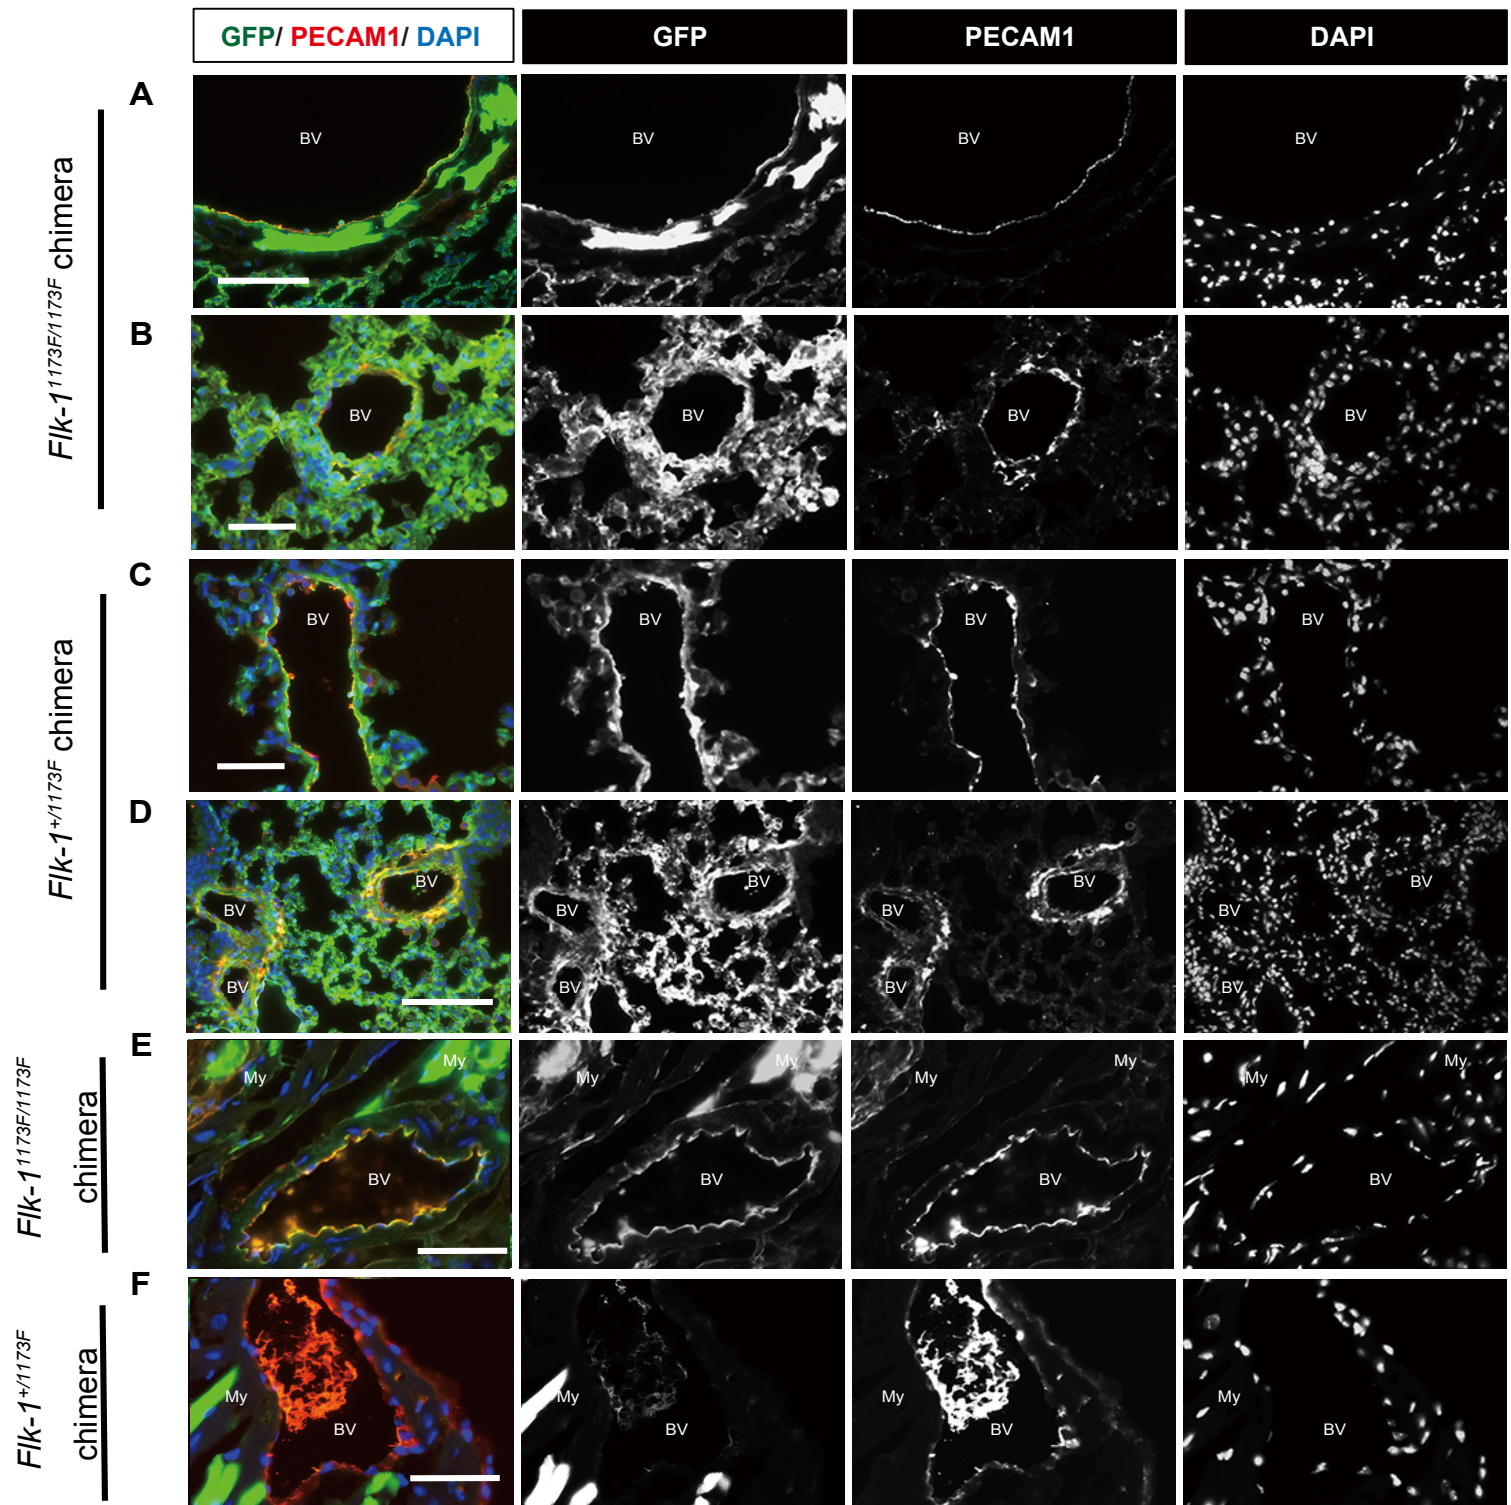

**Figure S2. Analysis of chimerism tissues of adult chimeric mice generated from *Flk-1*<sup>1173F/1173F</sup> blastocysts and GFP- labelled miPSCs. Related to Figure 2.**

(A to D) Section of lung, and heart (E and F) were immunostained with antibodies against GFP and PECAM1. Nuclei were counterstained with DAPI.

BV, blood vessel; My, myocardium. Scale bars, 50 $\mu$ m (B, C, E and F) and 100 $\mu$ m (A and D).

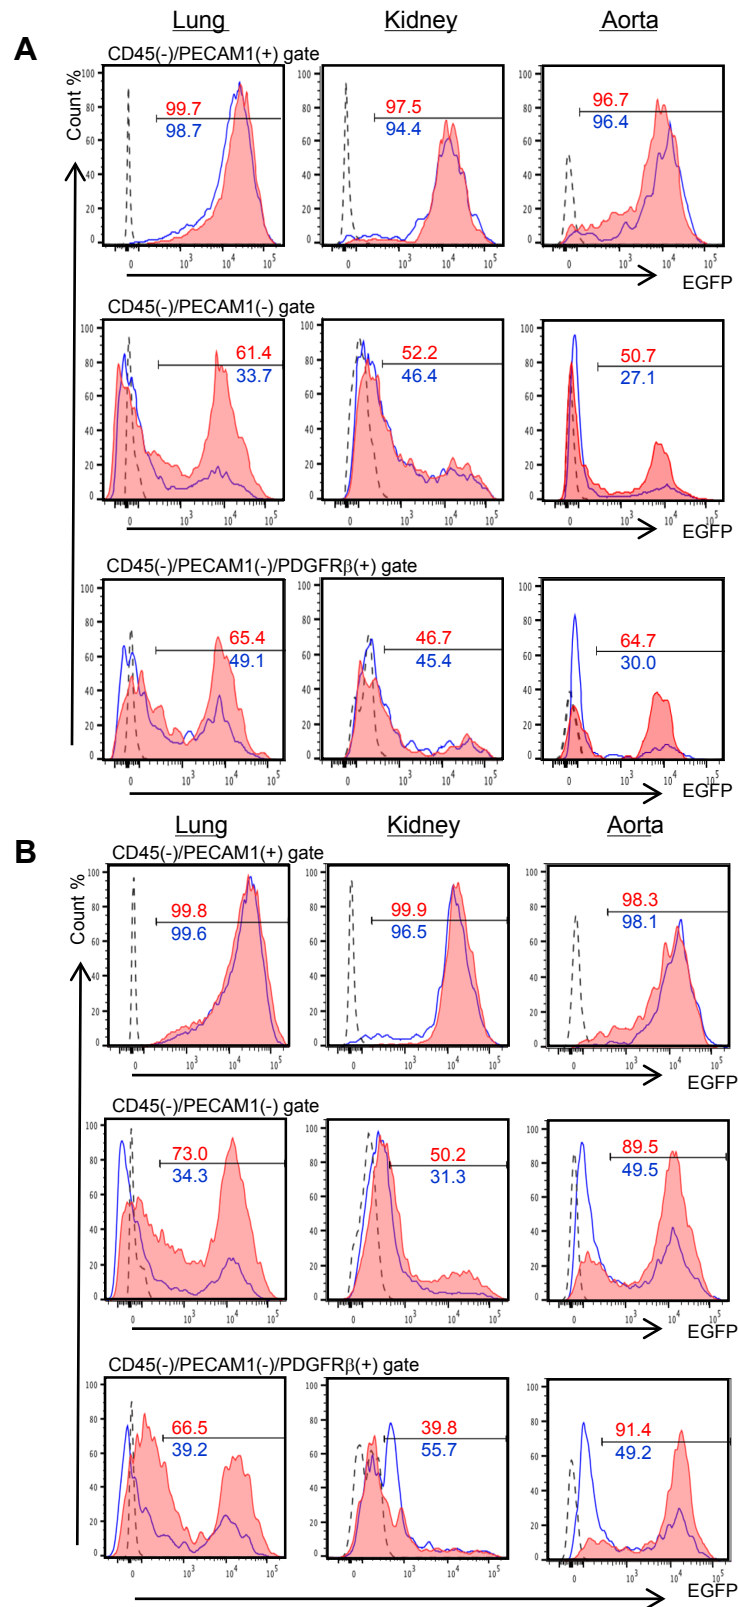

**Figure S3. Flow cytometry analysis of the EGFP-expressing mESC-derived cells in the vascular endothelium and pericytes of each organ. Related to Figure 3.**

(A and B) Ratio of donor cell contribution in lung, kidney and aorta of *Flk-1*<sup>1173F/1173F</sup> or *Flk-1*<sup>+/1173F</sup> chimeric mice were analyzed using antibodies against CD45, PECAM1, and PDGFRβ. Vascular endothelial cells (CD45<sup>+</sup>/PECAM1<sup>+</sup>), non-vascular endothelial cells (CD45<sup>+</sup>/PECAM1<sup>-</sup>) and pericytes (CD45<sup>-</sup>/PECAM1<sup>-</sup>/PDGFRβ<sup>+</sup>) were gated and analyzed for EGFP expression. Red line, *Flk-1*<sup>1173F/1173F</sup> chimeric mouse; blue line, *Flk-1*<sup>+/1173F</sup> chimeric mouse; gray dashed-line, C57BL/6 mouse shown as a control.

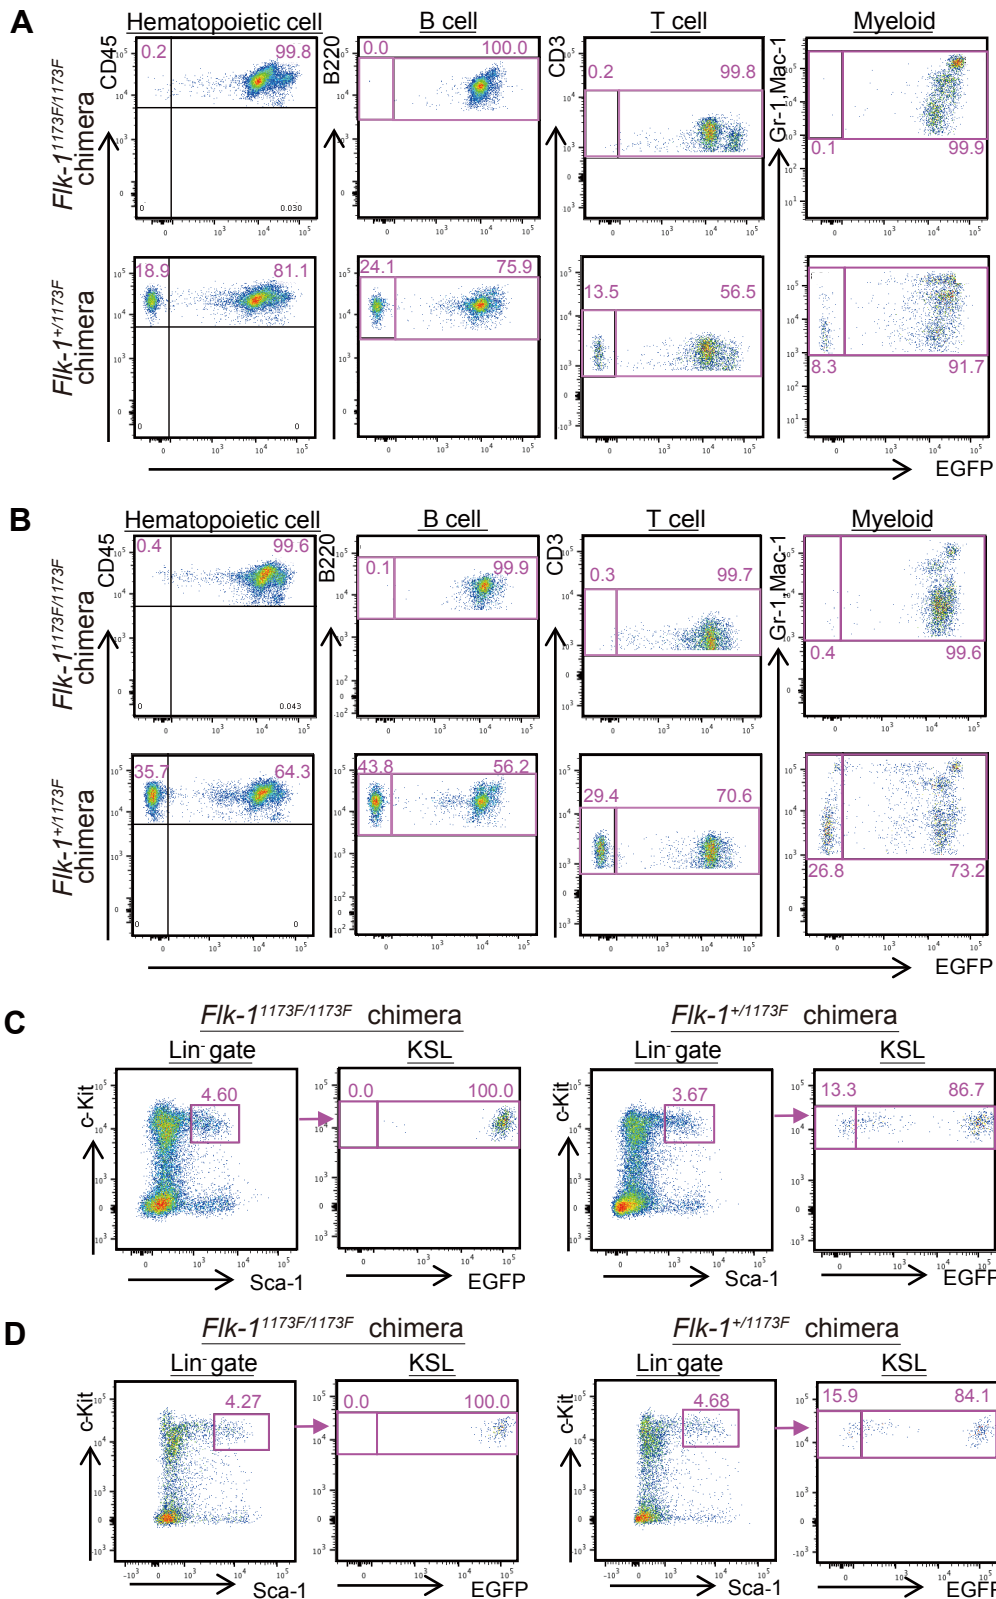

**Figure S4. Flow cytometry analysis of chimerism in mESC-derived hematopoietic cells.**

**Related to Figure 4.**

(A and B) Ratio of EGFP and hematopoietic lineage marker expression in peripheral blood from *Flk-1* mutant chimeras. (C and D) Flow cytometric plots and gating for the KSL HSCs fraction within the BM of *Flk-1* mutant chimeras.

## Supplemental Table

**Table S1. Results of *Flk-1*<sup>1173F/1173F</sup> mouse-rat interspecies blastocyst complementation. Related to Table 1.**

| Embryo-<br>nic Stage | Injected<br>Cell<br>Lines | Injection/<br>Transfer | No. (%) of Embryo |          | <i>Flk-1</i> Genotype (%) |                 |                             |
|----------------------|---------------------------|------------------------|-------------------|----------|---------------------------|-----------------|-----------------------------|
|                      |                           |                        | All               | Chimeras | +/+                       | +/ <i>1173F</i> | <i>1173F</i> / <i>1173F</i> |
| E13.5                | riPST1-3                  | 90                     | 11 (12)           | 11 (100) | 4 (36)                    | 7 (64)          | 0 (0)                       |
|                      | Fri6.1                    | 70                     | 13 (18)           | 11 (85)  | 4 (36)                    | 7 (64)          | 0 (0)                       |
|                      | Total                     | 160                    | 24 (15)           | 22 (92)  | 8 (36)                    | 14 (64)         | 0 (0)                       |
| E9.5                 | riPST1-3                  | 137                    | 73 (55)           | 73 (100) | 19 (26)                   | 37 (51)         | 17 (23)                     |
|                      | total                     |                        |                   |          | (*4)                      | (*16)           | (*10)                       |

(\*delay or small)
